# Supplementary material
Source: PubMed Central journal article supplement (PMC2894642)
Supplement: 00072.2009_1.pdf [file 00072.2009_1.pdf]

## Supplementary Methods: Modelling synaptic depression

The justification of the model was described previously (Wang and Manis 2008; Yang and Xu-Friedman 2008), and was based primarily on the model of Dittman *et al.* (2000), which is itself similar to models going back to Liley and North (1953). Briefly, we calculated the relative size of the  $i^{\text{th}}$  EPSC in a train of stimuli by:

$$EPSC_i = F D_i S_i \quad (1)$$

where  $F$  is the probability of release,  $D_i$  is the proportion of release sites that are ready to release on the  $i^{\text{th}}$  pulse,  $S_i$  is the proportion of receptors that are available (i.e. not desensitized). We did not model changes in  $F$ , as facilitation does not appear to be present under our conditions.

The number of release-ready sites,  $D$ , is reduced by release, such that immediately after a release event,  $D$  decreases by  $FD_i$ , and then recovers to resting levels at a rate depending on a calcium-dependent process:

$$\frac{dD(t)}{dt} = (1 - D(t)) \left( \frac{k_{\max} - k_0}{1 + K_D / CaD(t)} + k_0 \right), \quad (2)$$

where  $k_0$  is the resting recovery rate, and  $CaD(t)$  is the calcium-bound state of a sensor that drives a rapid recovery process of rate  $k_{\max}$ . The interaction between the rapid recovery process and the calcium-bound sensor is modelled as a simple affinity given by  $K_D$ .  $CaD$  increments after each EPSC, and decays to resting levels by a simple exponential, given by:

$$CaD_{i+1} = CaD_i e^{-\Delta t / \tau_D} \quad (3)$$

These equations yield an analytical expression for  $D_{i+1}$  based on the preceding pulse:

$$D_{i+1} = 1 - (1 - (1 - F)D_i) e^{-k_0 \Delta t} \left( \frac{K_D / CaD_i + 1}{K_D / CaD_i + e^{-\Delta t / \tau_D}} \right)^{-(k_{\max} - k_0) \tau_D} \quad (4)$$

where  $\Delta t$  is the interval between pulses.

Extracellular glutamate in the synaptic cleft drives desensitization according to a simple binding reaction:

$$S = K_S / (K_S + [\text{glutamate}]), \quad (5)$$

where  $K_S$  is the binding affinity of the receptor for extracellular glutamate. After the  $i^{\text{th}}$  release event, the glutamate concentration increments by the amount just released ( $FD_i$ ), and then decays exponentially back to resting levels, so that the glutamate concentration at the  $(i + 1)^{\text{th}}$  pulse is given by:

$$[\text{glutamate}]_{i+1} = ([\text{glutamate}]_i + FD_i)e^{-\Delta t / \tau_S}, \quad (6)$$

where  $\Delta t$  is the interval between pulses, and  $\tau_S$  is the rate of glutamate clearance.

The 7 free parameters of the model were fit to recorded PPR and trains data for a given cell using a least-squares approach. Parameters for the high-, middle-, and low-depressing endbulbs are given in Supplementary Table 3.

Supplementary Table 1: Correlations between parameters measured off PPR recovery or train depression curves.

|              | $\tau_f$ | $\tau_s$ | $A_f$  | $A_s$ | $SS_{100}$ | $SS_{200}$ | $SS_{333}$ | $\tau_{100}$ | $\tau_{200}$ | $\tau_{333}$ |
|--------------|----------|----------|--------|-------|------------|------------|------------|--------------|--------------|--------------|
| $\tau_f$     | 1        |          |        |       |            |            |            |              |              |              |
| $\tau_s$     | -0.016   | 1        |        |       |            |            |            |              |              |              |
| $A_f$        | -0.52    | -0.045   | 1      |       |            |            |            |              |              |              |
| $A_s$        | 0.40     | -0.48    | -0.51  | 1     |            |            |            |              |              |              |
| $SS_{100}$   | -0.54    | -0.14    | 0.16   | -0.36 | 1          |            |            |              |              |              |
| $SS_{200}$   | -0.36    | 0.054    | -0.076 | -0.17 | 0.70       | 1          |            |              |              |              |
| $SS_{333}$   | 0.12     | 0.18     | -0.52  | 0.32  | 0.12       | 0.50       | 1          |              |              |              |
| $\tau_{100}$ | -0.65    | 0.36     | 0.17   | -0.47 | 0.61       | 0.67       | 0.22       | 1            |              |              |
| $\tau_{200}$ | -0.64    | 0.28     | 0.15   | -0.46 | 0.70       | 0.72       | 0.20       | 0.95         | 1            |              |
| $\tau_{333}$ | -0.53    | 0.31     | 0.035  | -0.47 | 0.71       | 0.69       | 0.15       | 0.91         | 0.95         | 1            |

Supplementary Table 2: Principal components analysis. Rows represent the eigenvectors for each principle component  $X_i$ .

| $X_i$ | $\tau_f$ | $\tau_s$ | $A_f$ | $A_s$ | SS <sub>100</sub> | SS <sub>200</sub> | SS <sub>333</sub> | $\tau_{100}$ | $\tau_{200}$ | $\tau_{333}$ | Eigenvalue | Cum. var. |
|-------|----------|----------|-------|-------|-------------------|-------------------|-------------------|--------------|--------------|--------------|------------|-----------|
| 1     | -0.32    | 0.13     | 0.11  | -0.26 | 0.36              | 0.34              | 0.08              | 0.43         | 0.44         | 0.42         | 4.9        | 0.49      |
| 2     | 0.26     | 0.01     | -0.58 | 0.38  | 0.04              | 0.31              | 0.59              | 0.05         | 0.06         | 0.08         | 2.1        | 0.7       |
| 3     | -0.23    | -0.8     | 0.13  | 0.35  | 0.36              | 0.17              | -0.09             | -0.09        | -0.01        | -0.06        | 1.4        | 0.84      |
| 4     | -0.53    | 0.14     | 0.39  | 0.31  | -0.37             | 0                 | 0.47              | 0.14         | 0            | -0.27        | 0.57       | 0.9       |
| 5     | -0.27    | -0.03    | -0.38 | 0.42  | -0.28             | -0.41             | -0.38             | 0.27         | 0.23         | 0.3          | 0.47       | 0.94      |
| 6     | 0.53     | -0.14    | 0.42  | 0.21  | -0.46             | 0.35              | -0.17             | 0.23         | 0.21         | 0.16         | 0.25       | 0.97      |
| 7     | 0.34     | -0.14    | 0.29  | 0.04  | 0.28              | -0.68             | 0.4               | 0.18         | 0.16         | 0.15         | 0.16       | 0.99      |
| 8     | -0.07    | -0.54    | -0.25 | -0.59 | -0.45             | -0.07             | 0.23              | 0.19         | 0.07         | -0.05        | 0.13       | 1         |
| 9     | 0.09     | 0.02     | -0.08 | 0.03  | 0.18              | 0.03              | -0.13             | 0.77         | -0.47        | -0.34        | 0.046      | 1         |
| 10    | 0.1      | 0.05     | -0.12 | 0     | 0.11              | -0.02             | -0.13             | 0.03         | 0.68         | -0.7         | 0.027      | 1         |

Supplementary Table 3. Parameters used for the models in Fig. 4. The model is described in detail in Yang & Xu-Friedman (2008), and the Supplementary Methods.

| Parameter  | Meaning                                              | low   | middle | high |
|------------|------------------------------------------------------|-------|--------|------|
| $F$        | probability of release                               | 0.35  | 0.65   | 0.9  |
| $k_0$      | baseline recovery rate from depletion                | 1/s   | 0.5    | 0.6  |
| $k_{\max}$ | maximal recovery rate from depletion                 | 20/s  | 27     | 15   |
| $\tau_D$   | decay time constant for calcium-dependent recovery   | 10 ms | 10     | 30   |
| $K_D$      | affinity of fast recovery process for calcium sensor | 0.1   | 0.01   | 0.2  |
| $\tau_S$   | decay time constant of glutamate clearance           | 5 ms  | 5      | 5    |
| $K_S$      | affinity of receptor desensitization for glutamate   | 1     | 1      | 1    |

Supplementary Table 4. Steady-state conductance amplitudes predicted by the three depression models at three stimulation frequencies. In addition, the rightmost column indicates the postsynaptic threshold measured in current-clamp experiments after a train of 30 pulses normalized to threshold at the beginning ( $N = 4$  experiments).

| Frequency (Hz) | Depression model |        |       | Threshold       |
|----------------|------------------|--------|-------|-----------------|
|                | high             | middle | low   |                 |
| 333            | 0.045            | 0.105  | 0.138 | $1.47 \pm 0.12$ |
| 200            | 0.074            | 0.170  | 0.213 | $1.93 \pm 0.23$ |
| 100            | 0.14             | 0.310  | 0.355 | $2.38 \pm 0.34$ |

Supplementary Table 5. Comparison between sibling and non-sibling inputs onto the same target bushy cell using the Kolmogorov-Smirnov (K-S) test for individual measures. Data are from 10 pairs of siblings compared against the overall distribution of distances (i.e. 190 comparisons). *P* values below 0.05 are highlighted in bold. The main text and Fig. 6 report the plots and *P*-values for measures grouped together.

| Parameter               | <i>P</i> -value   |
|-------------------------|-------------------|
| EPSC <sub>1</sub>       | 0.0657752         |
| PPR ( $\Delta t$ in ms) |                   |
| 3                       | 0.0820644         |
| 5                       | 0.212364          |
| 10                      | 0.140841          |
| 20                      | 0.249175          |
| 50                      | 0.179377          |
| 100                     | 0.334117          |
| 200                     | 0.304269          |
| 500                     | 0.334117          |
| 1000                    | 0.101354          |
| 4000                    | 0.349546          |
| 100 Hz trains (pulse #) |                   |
| <b>2</b>                | <b>0.0242287</b>  |
| <b>3</b>                | <b>0.0521546</b>  |
| 4                       | 0.200975          |
| <b>5</b>                | <b>0.0242287</b>  |
| <b>6</b>                | <b>0.0112116</b>  |
| <b>7</b>                | <b>0.00592289</b> |
| <b>8</b>                | <b>0.0221065</b>  |
| <b>9</b>                | <b>0.00529738</b> |
| <b>10</b>               | <b>0.020144</b>   |
| <b>11</b>               | <b>0.00820421</b> |
| <b>12</b>               | <b>0.0037559</b>  |
| <b>13</b>               | <b>0.0183318</b>  |
| 14                      | 0.0881462         |
| <b>15</b>               | <b>0.0289917</b>  |
| <b>16</b>               | <b>0.00205284</b> |
| <b>17</b>               | <b>0.0112116</b>  |
| <b>18</b>               | <b>0.0183318</b>  |
| <b>19</b>               | <b>0.0265205</b>  |
| <b>20</b>               | <b>0.00529738</b> |
| 200 Hz trains (pulse #) |                   |
| <b>2</b>                | <b>0.0221065</b>  |
| <b>3</b>                | <b>0.00592289</b> |
| <b>4</b>                | <b>0.0443896</b>  |

|                         |                  |
|-------------------------|------------------|
| <b>5</b>                | <b>0.0289917</b> |
| <b>6</b>                | <b>0.0316522</b> |
| <b>7</b>                | <b>0.0443896</b> |
| 8                       | 0.140841         |
| 9                       | 0.0564202        |
| 10                      | 0.275905         |
| 11                      | 0.159329         |
| 12                      | 0.108498         |
| 13                      | 0.249175         |
| 14                      | 0.304269         |
| 15                      | 0.464839         |
| <b>16</b>               | <b>0.0242287</b> |
| <b>17</b>               | <b>0.0481476</b> |
| 18                      | 0.0564202        |
| 19                      | 0.628767         |
| 20                      | 0.108498         |
| 333 Hz trains (pulse #) |                  |
| <b>2</b>                | <b>0.020144</b>  |
| <b>3</b>                | <b>0.0183318</b> |
| 4                       | 0.212364         |
| 5                       | 0.319018         |
| 6                       | 0.189984         |
| 7                       | 0.289892         |
| 8                       | 0.289892         |
| 9                       | 0.159329         |
| 10                      | 0.108498         |
| 11                      | 0.289892         |
| 12                      | 0.51742          |
| 13                      | 0.554358         |
| 14                      | 0.304269         |
| 15                      | 0.482079         |
| 16                      | 0.249175         |
| 17                      | 0.249175         |
| 18                      | 0.200975         |
| 19                      | 0.349546         |
| 20                      | 0.36528          |
